# Supplementary material
Source: ML conference proceedings conference paper supplement (https://openreview.net/forum?id=DmakwvCJ7l)
Supplement: supplementary_material [file attachment]

## A Additional Related Work on Data-Centric Approach

**Data Augmentation** Data augmentation creates new examples with preserved labels but uses no unlabeled data (Shorten and Khoshgoftaar, 2019; Kashefi and Hwa, 2020; Balestrieri et al., 2022). Examples of heuristic data augmentation techniques include flipping, distorting, and rotating images (Shorten and Khoshgoftaar, 2019), using lexical substitution, inserting words, and shuffling sentences in texts (Kashefi and Hwa, 2020), and deleting nodes and dropping edges in graphs (Zhao et al., 2022). While human knowledge can be used to improve data diversity and reduce over-fitting in heuristic methods, it is difficult to use a single heuristic method to preserve the different labels for different tasks (Balestrieri et al., 2022; Cubuk et al., 2019). So, automated augmentation (Cubuk et al., 2019) learned from data to search for the best policy to combine a bunch of predefined heuristic augmentations. Generation models (Antoniou et al., 2017; Bowles et al., 2018; Han et al., 2022) create in-class examples. Other learning ideas such as FATTEN (Liu et al., 2018) and GREA (Liu et al., 2022) learned to split the latent space for data augmentation. However, learning and augmenting from insufficient labels at the same time may limit the diversity of new examples and cause over-fitting. DCT leverages unlabeled data to avoid them.

**Relationship between Data-Centric Approaches** As presented in Figure 7, perturb edges, delete nodes and mask attributes (Rong et al., 2019; Trivedi et al., 2022) for graphs are some heuristic ways for data augmentation. The augmented knowledge from them is mainly controlled by human prior knowledge on the perturbations and it often fails to be close to the task, *i.e.*, random perturbations hardly preserve labels for the augmented graphs. The learning to augment approaches learn from labeled graphs to perturb graph structures (Luo et al., 2022), to estimate graphons for different classes (Han et al., 2022), or to split the latent space for augmentation (Liu et al., 2022). Although these approaches could preserve labels for the augmented graphs, they introduce less extra knowledge to improve the model prediction. In summary, graph data augmentation is effective in expanding knowledge for limited labels, but it makes no use of unlabeled graphs. Besides, the diversity and richness of the domain knowledge from augmented graphs are far from that contained in a large number of unlabeled graphs. To learn from unlabeled graphs, data-centric approaches like the self-training is assumed to be useful when the unlabeled and labeled data are from the same source. It is less studied when we have a single unified unlabeled source for different tasks.

Figure 7: Qualitative relationship of graphs from different data-centric approach on the task relatedness and contained knowledge.

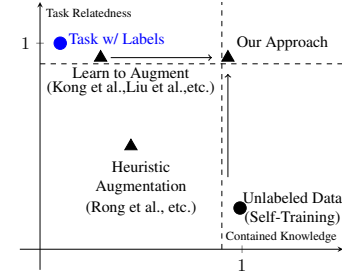

## B Additional Method Details

### B.1 Upper bounding the mutual information

In Eq. (6), we use a leave-one-out variant of InfoNCE ( $\mathcal{I}_{\text{bound}}$ ) to derive the upper bound of mutual information. We summarize the derivation (Poole et al., 2019) here.

$$\begin{aligned}
 \mathcal{I}_1(G'; G) &= \mathbb{E}_{p(G, G')} \left[ \log \frac{p(G'|G)}{p(G')} \right] \\
 &= \mathbb{E}_{p(G, G')} \left[ \log \frac{p(G'|G)q(G')}{q(G')p(G')} \right] \\
 &= \mathbb{E}_{p(G, G')} \left[ \log \frac{p(G'|G)}{q(G')} \right] - \text{KL}(p(G') || q(G')) \\
 &\leq \mathbb{E}_{p(G, G')} \left[ \log \frac{p(G'|G)}{q(G')} \right]
 \end{aligned} \tag{9}$$

The intractable upper bound is minimized when the variational approximation  $q(G')$  matches the true marginal  $p(G')$  (Poole et al., 2019). For each  $G_i$ , its augmented output  $G'_i$ , and  $M - 1$  negative

examples with different labels, we could approximate  $q(G'_i) = \frac{1}{M-1} \sum_{j \neq i} p(G'_i|G_j)$ . So, we have

$$\begin{aligned} \mathcal{I}_1(G'_i, G_i) &\leq \log \frac{p(G'_i|G_i)}{\frac{1}{M-1} \sum_{j=1, j \neq i}^M p(G'_i|G_j)} \\ &= \log \frac{p(G'_i|G_i)}{\sum_{j=1, j \neq i}^M p(G'_i|G_j)} + \log(M-1) \\ &= \mathcal{I}_{\text{bound}}(G'_i; G_i) + \text{constant} \end{aligned} \quad (10)$$

## B.2 Extraction of Statistical Features on Graphs

For each molecule and polymer graph, we concatenate the following vectors or values for statistical feature extraction.

- the sum of the degree in the graph;
- the vector indicating the distribution of atom types;
- the vector containing the maximum, minimum and mean values of atoms weights in a molecule or polymer;
- the vector containing the maximum, minimum, and mean values of bond valence.

For each protein-protein interaction ego-graph in the biology field, we use the sorted vector of node degree distribution in the graph as the statistical features.

## B.3 Technical Details for Graph Data Augmentation with Diffusion Model

**The Lookup Table from Atom Type to Node Embedding Space** Given a graph  $G$ , we assume the node feature matrix on the graph is  $\mathbf{X} \in \mathbb{R}^{n \times F_n}$ , where  $n$  is the number of nodes. The edge feature matrix is  $\mathbf{E} \in \mathbb{R}^{m \times F_e}$ , where  $m$  is the number of edges. There are two ways for  $G$  to represent the graph structure in practice. We can use either the dense adjacency matrix  $\mathbf{A} \in \mathbb{R}^{n \times n}$  or sparse edge index  $\mathbf{I}_e \in \mathbb{R}^{2 \times m}$ . The diffusion model (Jo et al., 2022) on graphs prefers the former, which is more straightforward for graph generations. The prediction model prefers the latter because of its flexibility, and less computational cost and time. The transformation between two types of graph structure representation takes additional time. Particularly for molecular graphs, the node features used for generation (one-hot encoding of the atom type) and for prediction (see the official package of OGBG<sup>1</sup> for details) are different, which introduces extra time to process the graph data. For details, we (1) first need to extract discrete node attributes given the atom type and its neighborhoods; (2) we then need to use an embedding table to embed node attributes in a continuous embedding space; (3) the embedding features of nodes with their graph structure are inputted into the graph neural networks to get the latent representation for nodes. The reverse process for data augmentation in DCT may need to repeatedly process graph data with steps (1) and (2). It introduces additional time. So, we build up a lookup table to directly map the atom type to the node embedding. To achieve it, we average the node attributes for the same type of node within the batch. We then use the continuous node attributes as weights to average the corresponding node embedding according to the embedding table.

**Instantiations of SDE on Graphs** According to Song et al. (2021), we use the Variance Exploding (VE) SDE for the diffusion process. Given the minimal noise  $\sigma_{\min}$  and the maximal noise  $\sigma_{\max}$ , the VE SDE is:

$$dG = \sigma_{\min} \left( \frac{\sigma_{\max}}{\sigma_{\min}} \right)^t \sqrt{2 \log \frac{\sigma_{\max}}{\sigma_{\min}}} d\mathbf{w}, \quad t \in (0, 1] \quad (11)$$

The perturbation kernel is derived (Song et al., 2021) as:

$$p_{0t}(G^{(t)} | G^{(0)}) = \mathcal{N} \left( G^{(t)}; G^{(0)}, \sigma_{\min}^2 \left( \frac{\sigma_{\max}}{\sigma_{\min}} \right)^{2t} \mathbf{I} \right), \quad t \in (0, 1] \quad (12)$$

On graphs, we follow Jo et al. (2022) to separate the perturbation of adjacency matrix and node features:

$$p_{0t}(G^{(t)} | G^{(0)}) = p_{0t}(\mathbf{A}^{(t)} | \mathbf{A}^{(0)}) p_{0t}(\mathbf{X}^{(t)} | \mathbf{X}^{(0)}). \quad (13)$$

<sup>1</sup><https://github.com/snap-stanford/ogb/blob/master/ogb/utils/features.py>

553 **The Sampling Algorithm in the Reverse Process for Graph Data Augmentation** We adapt  
 554 the Predictor-Corrector (PC) samplers for the graph data augmentation in the reverse process. The  
 555 algorithm is shown in Algorithm 1.

---

**Algorithm 1** Diffusion-Based Graph Augmentation with PC Sampling

---

**Input:** Graph  $G$  with node feature  $\mathbf{X}$  and adjacency matrix  $\mathbf{A}$ , the denoising function for node feature  $\mathbf{s}_\mathbf{X}$  and adjacency matrix  $\mathbf{s}_\mathbf{A}$ , the fine-tune loss  $\mathcal{L}_\text{aug}$ , Langevin MCMC step size  $\beta$ , scaling coefficient  $\epsilon_1$   
 $\mathbf{A}^{(D)} \leftarrow \mathbf{A} + \mathbf{z}_\mathbf{A}; \quad \mathbf{z}_\mathbf{A} \sim \mathcal{N}(\mathbf{0}, \mathbf{I})$   
 $\mathbf{X}^{(D)} \leftarrow \mathbf{X} + \mathbf{z}_\mathbf{X}; \quad \mathbf{z}_\mathbf{X} \sim \mathcal{N}(\mathbf{0}, \mathbf{I})$   
**for**  $t = D - 1$  **to**  $0$  **do**  
 $\hat{G}_{(t+1)} \sim p_{0t+1}(\hat{G}_{(t+1)} | G^{(t+1)})$  {inner-loop sampling with another PC sampler}  
 $\mathbf{S}_\mathbf{A} = \frac{1}{2} \mathbf{s}_\mathbf{A}(\hat{G}_{(t+1)}, t+1) - \frac{1}{2} \alpha \nabla_{\mathbf{A}^{(t)}} \mathcal{L}_\text{aug}(\hat{G}_{(t+1)})$   
 $\mathbf{S}_\mathbf{X} = \frac{1}{2} \mathbf{s}_\mathbf{X}(\hat{G}_{(t+1)}, t+1) - \frac{1}{2} \alpha \nabla_{\mathbf{X}^{(t)}} \mathcal{L}_\text{aug}(\hat{G}_{(t+1)})$   
 $\tilde{\mathbf{A}}^{(t)} \leftarrow \mathbf{A}^{(t+1)} + g(t)^2 \mathbf{S}_\mathbf{A} + g(t) \mathbf{z}_\mathbf{A}; \quad \mathbf{z}_\mathbf{A} \sim \mathcal{N}(\mathbf{0}, \mathbf{I})$  {Predictor for adjacency matrix}  
 $\tilde{\mathbf{X}}^{(t)} \leftarrow \mathbf{X}^{(t+1)} + g(t)^2 \mathbf{S}_\mathbf{X} + g(t) \mathbf{z}_\mathbf{X}; \quad \mathbf{z}_\mathbf{X} \sim \mathcal{N}(\mathbf{0}, \mathbf{I})$  {Predictor for node features}  
 $\mathbf{A}^{(t)} \leftarrow \tilde{\mathbf{A}}^{(t)} + \frac{\beta}{2} \mathbf{S}_\mathbf{A} + \epsilon_1 \sqrt{\beta} \mathbf{z}_\mathbf{A}; \quad \mathbf{z}_\mathbf{A} \sim \mathcal{N}(\mathbf{0}, \mathbf{I})$  {Corrector for adjacency matrix}  
 $\mathbf{X}^{(t)} \leftarrow \tilde{\mathbf{X}}^{(t)} + \frac{\beta}{2} \mathbf{S}_\mathbf{X} + \epsilon_1 \sqrt{\beta} \mathbf{z}_\mathbf{X}; \quad \mathbf{z}_\mathbf{X} \sim \mathcal{N}(\mathbf{0}, \mathbf{I})$  {Corrector for node features}  
**end for**  
 return  $G' = (\mathbf{A}^{(0)}, \mathbf{X}^{(0)})$

---

556 **The Algorithm of the Framework** The algorithm of the proposed data-centric knowledge transfer  
 557 framework is presented in Algorithm 2 and Algorithm 3. In detail, Algorithm 2 corresponds to  
 558 Section 4.2 and Algorithm 3 corresponds to Section 4.3.

---

**Algorithm 2** The Data-Centric Knowledge Transfer Framework: Learning from Unlabeled Graphs   **Algorithm 3** The Data-Centric Knowledge Transfer Framework: Generating Task-specific Labeled Graphs

---

|                                                                                                                                                                                                                                                                                                                                                                                                                                                                                                                                                                                                                                                                                                                                                                                                                                                                                                                                                                                                                                                                                                                                                                                                                                                                                                                                            |                                                                                                                                                                                                                                                                                                                                                                                                                                                                                                                                                                                                                                                                                                                                                                                                                                                                                                                                                                                                                                                                                                                                                                                               |
|--------------------------------------------------------------------------------------------------------------------------------------------------------------------------------------------------------------------------------------------------------------------------------------------------------------------------------------------------------------------------------------------------------------------------------------------------------------------------------------------------------------------------------------------------------------------------------------------------------------------------------------------------------------------------------------------------------------------------------------------------------------------------------------------------------------------------------------------------------------------------------------------------------------------------------------------------------------------------------------------------------------------------------------------------------------------------------------------------------------------------------------------------------------------------------------------------------------------------------------------------------------------------------------------------------------------------------------------|-----------------------------------------------------------------------------------------------------------------------------------------------------------------------------------------------------------------------------------------------------------------------------------------------------------------------------------------------------------------------------------------------------------------------------------------------------------------------------------------------------------------------------------------------------------------------------------------------------------------------------------------------------------------------------------------------------------------------------------------------------------------------------------------------------------------------------------------------------------------------------------------------------------------------------------------------------------------------------------------------------------------------------------------------------------------------------------------------------------------------------------------------------------------------------------------------|
| <p><b>Input:</b> Given unlabeled graphs from the space <math>\mathcal{G}^{[U]}</math>, randomly initialized score models <math>\mathbf{s}_\mathbf{X}</math> and <math>\mathbf{s}_\mathbf{A}</math> for node feature and graph adjacency matrix, respectively, the total diffusion time step <math>T</math>.<br/> <b>while</b> <math>\mathbf{s}_\mathbf{X}</math> and <math>\mathbf{s}_\mathbf{A}</math> not converged <b>do</b><br/>       559    Sample <math>G = (\mathbf{X}, \mathbf{A}) \in \mathcal{G}^{[U]}</math><br/>            Sample <math>t \in \text{Uniform}(1, 2, \dots, T)</math><br/>            Sample <math>\mathbf{z}_\mathbf{A} \sim \mathcal{N}(\mathbf{0}, \mathbf{I})</math><br/>            Sample <math>\mathbf{z}_\mathbf{X} \sim \mathcal{N}(\mathbf{0}, \mathbf{I})</math><br/>            Sample <math>\hat{G}</math> with <math>t, \mathbf{z}_\mathbf{A}, \mathbf{z}_\mathbf{X}</math> and Eq. (13)<br/>            Optimize <math>\mathbf{s}_\mathbf{A}</math> with the gradient:<br/>                <math>\nabla \ \mathbf{z}_\mathbf{A} - \mathbf{s}_\mathbf{A}(\hat{G}, t)\ ^2</math><br/>            Optimize <math>\mathbf{s}_\mathbf{X}</math> with the gradient:<br/>                <math>\nabla \ \mathbf{z}_\mathbf{X} - \mathbf{s}_\mathbf{X}(\hat{G}, t)\ ^2</math><br/> <b>end while</b></p> | <p><b>Input:</b> Given task <math>k</math> with the graph-label space <math>(\mathcal{G}, \mathcal{Y})</math>, a randomly initialized prediction model <math>f_\theta</math>, the well-trained score model <math>\mathbf{s} = (\mathbf{s}_\mathbf{X}, \mathbf{s}_\mathbf{A})</math>, the training data set <math>\{G_i, y_i\}_i^{N_t}</math>, total training epoch <math>e</math>, the hyper-paramtere <math>n</math><br/> <b>for</b> current epoch <math>e_i</math> from 1 to <math>e</math> <b>do</b><br/>          Train <math>f_\theta</math> on current training data <math>\{G_i, y_i\}_i^{N_t}</math><br/>          <b>if</b> <math>e_i</math> is divisible by the augmentation interval <b>then</b><br/>           Select <math>n</math> graph-label pairs with the lowest training loss from <math>\{G_i, y_i\}_i^{N_t}</math><br/>           Get the augmented examples <math>\{G'_i, y'_i\}_i^n</math> by Algorithm 1 with the selected examples<br/>           Update <math>\{G_i, y_i\}_i^{N_t}</math> with <math>\{G'_i, y'_i\}_i^n</math>, e.g., add <math>\{G'_i, y'_i\}_i^n</math> to <math>\{G_i, y_i\}_i^{N_t}</math>.<br/>          <b>end if</b><br/> <b>end for</b></p> |
|--------------------------------------------------------------------------------------------------------------------------------------------------------------------------------------------------------------------------------------------------------------------------------------------------------------------------------------------------------------------------------------------------------------------------------------------------------------------------------------------------------------------------------------------------------------------------------------------------------------------------------------------------------------------------------------------------------------------------------------------------------------------------------------------------------------------------------------------------------------------------------------------------------------------------------------------------------------------------------------------------------------------------------------------------------------------------------------------------------------------------------------------------------------------------------------------------------------------------------------------------------------------------------------------------------------------------------------------|-----------------------------------------------------------------------------------------------------------------------------------------------------------------------------------------------------------------------------------------------------------------------------------------------------------------------------------------------------------------------------------------------------------------------------------------------------------------------------------------------------------------------------------------------------------------------------------------------------------------------------------------------------------------------------------------------------------------------------------------------------------------------------------------------------------------------------------------------------------------------------------------------------------------------------------------------------------------------------------------------------------------------------------------------------------------------------------------------------------------------------------------------------------------------------------------------|

---

## 560 C Additional Experiments Set-ups

561 We perform experiments on 15 datasets, including eight classification and seven regression tasks from  
 562 chemistry, material science, and biology. We use Area under the ROC curve (AUC) for classification  
 563 performance and mean absolute error (MAE) for regression.

### 564 C.1 Molecule Classification and Regression Tasks

565 Seven molecule classification and three molecule regression tasks are from open graph benchmark (Hu  
 566 et al., 2020). They were originally collected by MoleculeNet (Wu et al., 2018) and used to predict  
 567 molecule properties. They include (1) inhibition to HIV virus replication in ogbg-HIV, (2) toxicologi-  
 568 cal properties of 617 types in ogbg-ToxCast, (3) toxicity measurements such as nuclear receptors and  
 569 stress response in ogbg-Tox21, (4) blood-brain barrier permeability in ogbg-BBBP, (5) inhibition to  
 570 human  $\beta$ -secretase 1 in ogbg-BACE, (6) FDA approval status or failed clinical trial in ogbg-ClinTox,

Table 3: Statistics of datasets for graph property prediction in different domains.

| Data Type | Dataset             | # Graphs | Prediction Task | # Task | Avg./Max # Nodes | Avg./Max # Edges |
|-----------|---------------------|----------|-----------------|--------|------------------|------------------|
| Molecules | ogbg-HIV            | 41,127   | Classification  | 1      | 25.5 / 222       | 54.9 / 502       |
|           | ogbg-ToxCast        | 8,576    | Classification  | 617    | 18.8 / 124       | 38.5 / 268       |
|           | ogbg-Tox21          | 7,831    | Classification  | 12     | 18.6 / 132       | 38.6 / 290       |
|           | ogbg-BBBP           | 2,039    | Classification  | 1      | 24.1 / 132       | 51.9 / 290       |
|           | ogbg-BACE           | 1,513    | Classification  | 1      | 34.1 / 97        | 73.7 / 202       |
|           | ogbg-ClinTox        | 1,477    | Classification  | 2      | 26.2 / 136       | 55.8 / 286       |
|           | ogbg-SIDER          | 1,427    | Classification  | 27     | 33.6 / 492       | 70.7 / 1010      |
|           | ogbg-Lipo           | 4200     | Regression      | 1      | 27 / 115         | 59 / 236         |
|           | ogbg-ESOL           | 1128     | Regression      | 1      | 13.3 / 55        | 27.4 / 124       |
|           | ogbg-FreeSolv       | 642      | Regression      | 1      | 8.7 / 24         | 16.8 / 50        |
| Polymers  | GlassTemp           | 7,174    | Regression      | 1      | 36.7 / 166       | 79.3 / 362       |
|           | MeltingTemp         | 3,651    | Regression      | 1      | 26.9 / 102       | 55.4 / 212       |
|           | ThermCond           | 759      | Regression      | 1      | 21.3 / 71        | 42.3 / 162       |
|           | O <sub>2</sub> Perm | 595      | Regression      | 1      | 37.3 / 103       | 82.1 / 234       |
| Proteins  | PPI                 | 88000    | Classification  | 40     | 49.4 / 111       | 890.8 / 11556    |

(7) having drug side effects of 27 system organ classes in ogbg-SIDER, (8) predicting the property of lipophilicity in ogbg-Lipo, (9) predicting the water solubility (log solubility in mols per litre) from chemical structures in ogbg-ESOL, (10) predicting the hydration free energy of molecules in water in ogbg-FreeSolv. For all molecule datasets, we use the scaffold splitting procedure as the open graph benchmark adopted (Hu et al., 2020). It attempts to separate structurally different molecules into different subsets, which provides a more realistic estimate of model performance in experiments (Wu et al., 2018).

## C.2 Polymer Regression Tasks

Four polymer regression tasks include GlassTemp, MeltingTemp, ThermCond, and O<sub>2</sub>Perm. They are used to predict different polymer properties such as *glass transition temperature* (°C), *melting temperature* (°C), *thermal conductivity* (W/mK) and *oxygen permeability* (Barrer). GlassTemp and MeltingTemp are collected from PolyInfo, which is the largest web-based polymer database (Otsuka et al., 2011). The ThermCond dataset is from molecular dynamics simulation and is an extension from the dataset used in (Ma et al., 2022). The O<sub>2</sub>Perm dataset is created from the Membrane Society of Australasia portal, consisting of a variety of gas permeability data (Thornton et al., 2012). Since a polymer is built from repeated units, researchers often use a single unit graph with polymerization points as polymer graphs to predict properties. Different from molecular graphs, two polymerization points are two special nodes (see “\*” in Figure 2), indicating the polymerization of monomers (Cormack and Elorza, 2004). For all the polymer tasks, we randomly split by 60%/10%/30% for training, validation, and test.

## C.3 Protein Classification Task

An additional task is protein function prediction using protein-protein interaction graphs (Hu et al., 2019). A node is a protein without attributes, an edge is a relation type between two proteins such as co-expression and co-occurrence. In our DCT, we treat all the relations as the undirected edge without attributes.

## C.4 Baselines and Implementation

When implementing GIN (Xu et al., 2019), we tune its hyper-parameters for different tasks with an early stop on the validation set. We generally implement pre-training baselines following their own setting. For molecule and polymer property prediction and protein function prediction, the pre-trained GIN models with self-supervised tasks such as EDGE-PRED, ATTR-MASK, CONTEXT-PRED in (Hu et al., 2019), INFO-MAX (Velickovic et al., 2019) are available. So we directly use them. For other self-supervised methods, we implement their codes with default hyper-parameters. Following their settings, we use 2M ZINC15 (Sterling and Irwin, 2015) to pre-train GIN models for molecule and polymer property prediction. We use 306K unlabeled protein-protein interaction ego-networks (Hu et al., 2019) to pre-train the GIN for the downstream protein function property prediction. For

self-training with real unlabeled graphs and INFOGRAPH (Sun et al., 2020), we use 113K QM9 (Ramakrishnan et al., 2014). For self-training with generated unlabeled graphs, we train the diffusion model (Jo et al., 2022) on the real QM9 dataset and then produce the same number of generated unlabeled graphs. To train the diffusion model in our DCT, we also use QM9 (Ramakrishnan et al., 2014).

## **D Additional Experiment Analysis**

### **D.1 The Power of Diffusion Model to Learn from Unlabeled Graphs**

In Table 2, when we replace the 133K QM9 with the 249K ZINC (Jo et al., 2022) to train the diffusion model, which nearly doubles the size of the unlabeled graphs and includes more atom types, we do not observe any additional improvement, and in some cases, even worse performance. It is possible because of the constraint of the current diffusion model’s capacity to model the data distribution for a much larger number of more complex graphs. It encourages powerful generative models in the future, which could be directly used to benefit predictive models under the proposed framework.
